# Supplementary material for: Parameter estimation of dynamic biological network models using integrated fluxes
Source: BMC Syst Biol. 2014 Nov 18;8:127. doi: 10.1186/s12918-014-0127-x (PMC4241227; doi:10.1186/s12918-014-0127-x)
Supplement: Additional file 1 — Supplementary to parameter estimation of dynamic biological network models using integrated fluxes. The additional file contains the flowchart of integrated flux parameter estimation (IFPE) methods with unmeasured concentrations, the modified Simpson’s rule used in the calculation of IFs, the parameters and initial conditions used to generate time-series data in the branched pathway case study, the smoothened time-series concentration figure using different piecewise spline-fitting parameters, the comparison of concentration errors Φ, the parameter estimation results using noise-free data without the concentration measurements of X 3, and the IFPE performance with different selections of independent fluxes. [file 12918_2014_127_MOESM1_ESM.pdf]

## METHODOLOGY ARTICLE

# Supplementary to parameter estimation of dynamic biological network models using integrated fluxes

Yang Liu and Rudiyanto Gunawan\*

\*Correspondence:

rudi.gunawan@chem.ethz.ch  
Institute for Chemical and  
Bioengineering, ETH Zurich,  
Vladimir-Perlog-Weg 1, 8093  
Zurich, Switzerland  
Full list of author information is  
available at the end of the article

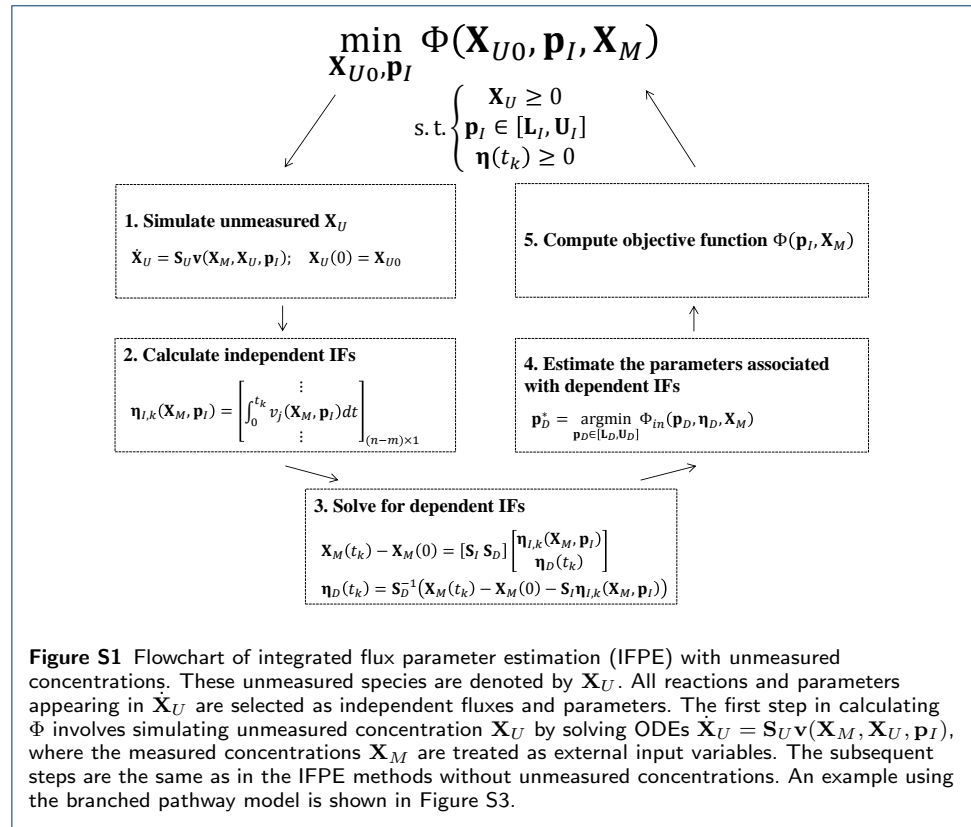

## 1 Modified Simpson's rule

We performed the integration of flux function  $\eta(\mathbf{X}, \mathbf{p}) = \int_0^t \mathbf{v}(\mathbf{X}, \mathbf{p}) dt$  using the following modified Simpson's quadrature rule:

$$\int_{t_1}^{t_2} f(t) dt \approx \frac{t_2 - t_1}{6} \left[ \frac{2 + 3\beta}{1 + \beta} f(t_1) + \frac{1 + 3\beta}{\beta} f(t_2) - \frac{1}{\beta(1 + \beta)} f(t_3) \right], \quad (1)$$

where  $\beta = (t_3 - t_2)/(t_2 - t_1)$ . The quadrature function above was derived from the ordinary Simpson's rule, by calculating the shaded area of the quadratic polynomial determined by three points  $(t_1, f(t_1))$ ,  $(t_2, f(t_2))$ , and  $(t_3, f(t_3))$  as illustrated

in Figure S2. In the special case that the time-series data are taken at equally distributed time points, the quadrature function above reduces to (by setting  $\beta = 1$ ):

$$\int_{t_1}^{t_2} f(t)dt \approx \frac{dt}{12} [5f(t_1) + 8f(t_2) - f(t_3)]. \quad (2)$$

To calculate the integral between last two time points, the area between  $t_{N-1}$  and  $t_N$  under the curve of the quadratic polynomial is

$$\int_{t_{N-1}}^{t_N} f(t)dt \approx \frac{t_N - t_{N-1}}{6} \left[ -\frac{1}{\beta'(1 + \beta')} f(t_{N-2}) + \frac{1 + 3\beta'}{\beta'} f(t_{N-1}) + \frac{2 + 3\beta'}{1 + \beta'} f(t_N) \right], \quad (3)$$

where  $\beta' = (t_{N-1} - t_{N-2})/(t_N - t_{N-1})$ .

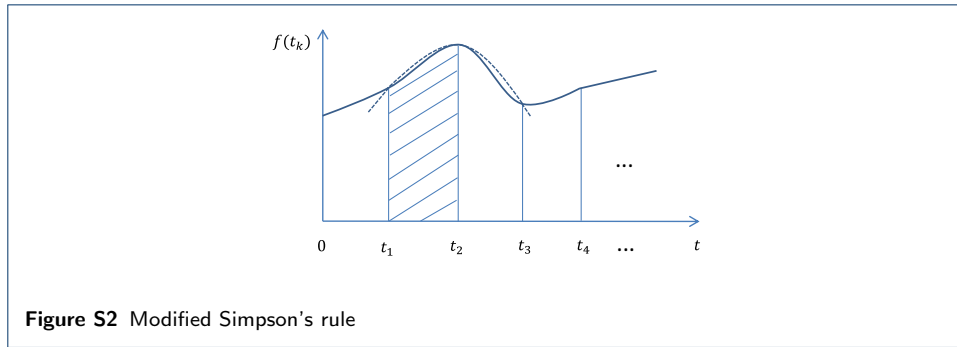

## 2 Supplementary information for the branched pathway case study

We generated the *in silico* data by simulating the ODE model in Eqs. (11) and (12) using the parameter values:  $a_1 = 12$ ,  $g_{13} = 0.8$ ,  $a_2 = 8$ ,  $g_{21} = 0.5$ ,  $a_3 = 3$ ,  $g_{32} = 0.75$ ,  $a_4 = 5$ ,  $g_{43} = 0.5$ ,  $g_{44} = 0.2$ ,  $a_5 = 2$ ,  $g_{51} = 0.5$ ,  $a_6 = 6$ ,  $g_{64} = 0.8$ , and the initial conditions:

$$\begin{bmatrix} X_1(0) \\ X_2(0) \\ X_3(0) \\ X_4(0) \end{bmatrix} = \begin{bmatrix} 1.4 \\ 2.7 \\ 1.2 \\ 0.4 \end{bmatrix}.$$

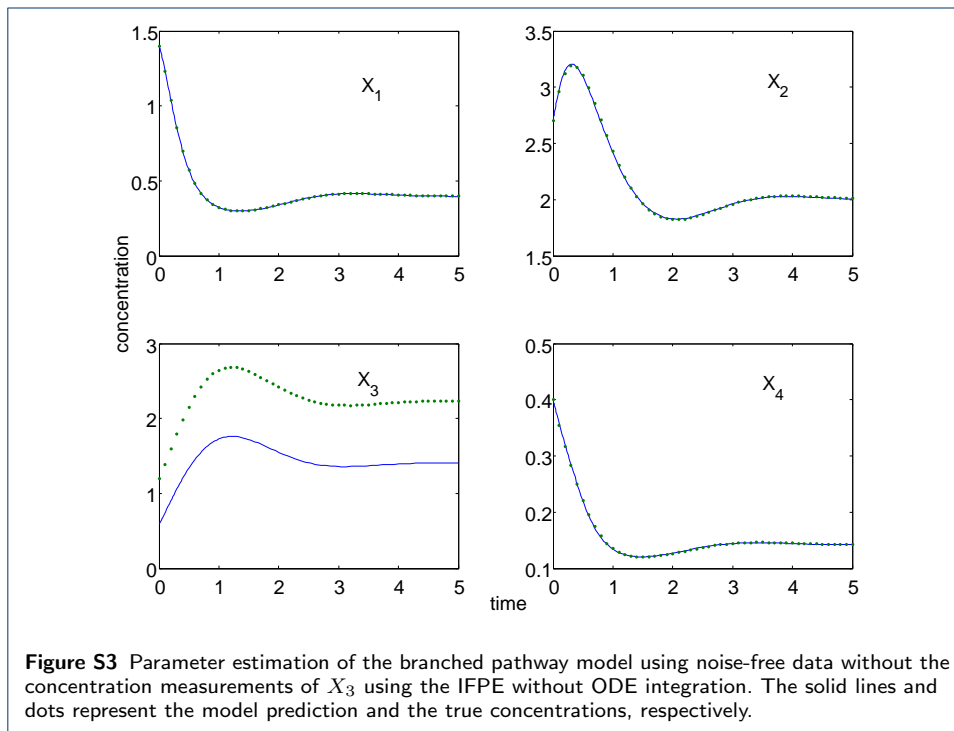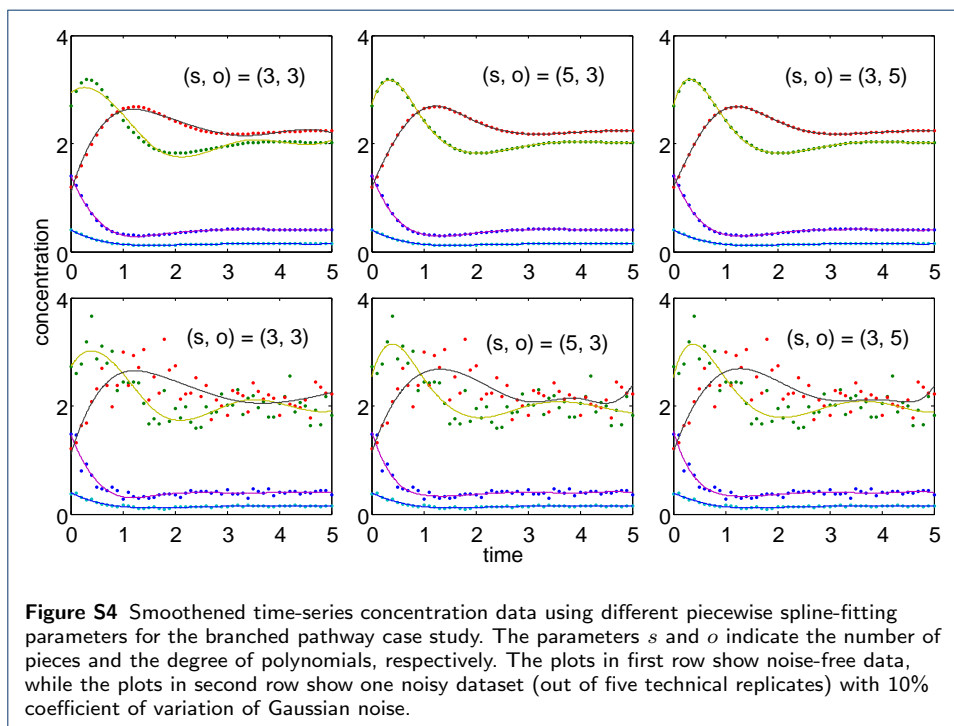

**Table S1** Comparison of concentration errors  $\Phi$  for the branched pathway case study

| Concentration error | Noise-free data <sup>a</sup> |                        |                       | Noisy data <sup>b</sup> |                   |                   |
|---------------------|------------------------------|------------------------|-----------------------|-------------------------|-------------------|-------------------|
|                     | $(s, o) = (3, 3)$            | $(s, o) = (5, 3)$      | $(s, o) = (3, 5)$     | $(s, o) = (3, 3)$       | $(s, o) = (5, 3)$ | $(s, o) = (3, 5)$ |
| SPE-slope           | $6.18 \times 10^{-2}$        | $2.27 \times 10^{-2}$  | $1.95 \times 10^{-2}$ | $0.280 \pm 0.165$       | $0.217 \pm 0.022$ | $0.227 \pm 0.024$ |
| IPE-slope           | $6.03 \times 10^{-2}$        | $1.73 \times 10^{-2}$  | $1.40 \times 10^{-2}$ | $0.183 \pm 0.031$       | $0.179 \pm 0.021$ | $0.178 \pm 0.018$ |
| IPE-ODE             | $2.37 \times 10^{-2}$        | $7.44 \times 10^{-3}$  | $4.12 \times 10^{-3}$ | $0.162 \pm 0.012$       | $0.160 \pm 0.011$ | $0.160 \pm 0.011$ |
| SPE-ODE             |                              | $2.48 \times 10^{-3c}$ |                       |                         | $0.157 \pm 0.014$ |                   |
| IFPE                |                              | $2.83 \times 10^{-4}$  |                       |                         | $0.161 \pm 0.014$ |                   |
| IFPE-ODE            |                              | $1.65 \times 10^{-4}$  |                       |                         | $0.157 \pm 0.014$ |                   |

a. For noise-free data, five independent runs were carried out. The concentration error is reported for the run with the lowest objective function value.

b. For noisy data, the reported values are the mean  $\pm$  standard deviation of five technical replicates of the data.

c. Only three out of five repeated runs finished within 24 hours. The concentration error is reported for the run with the lowest objective function value among the three successful runs.

**Table S2** Comparison of median parameter errors for the branched pathway case study with different partitioning of independent and dependent flux set.

| Median parameter error <sup>a</sup> (%) | Noise-free data <sup>b</sup> |          | Noisy data <sup>c</sup> |                 |
|-----------------------------------------|------------------------------|----------|-------------------------|-----------------|
|                                         | IFPE                         | IFPE-ODE | IFPE                    | IFPE-ODE        |
| Independent fluxes                      |                              |          |                         |                 |
| $\{V_1, V_6\}^d$                        | 0.276                        | 0.746    | $66.9 \pm 32.5$         | $70.0 \pm 31.6$ |
| $\{V_1, V_5\}$                          | 0.293                        | 0.734    | $64.0 \pm 33.0$         | $50.6 \pm 26.9$ |
| $\{V_2, V_6\}$                          | 0.270                        | 1.00     | $68.6 \pm 32.2$         | $70.7 \pm 27.7$ |
| $\{V_1, V_3\}$                          | 0.262                        | 0.755    | $59.1 \pm 26.4$         | $60.6 \pm 15.0$ |
| $\{V_2, V_5\}$                          | 0.281                        | 0.975    | $66.1 \pm 27.9$         | $66.8 \pm 33.8$ |
| $\{V_1, V_4\}$                          | 0.238                        | 0.839    | $60.3 \pm 29.6$         | $68.5 \pm 20.9$ |

a. The median is taken over 13 parameters in the branched pathway model.

b. For noise-free data, five independent runs were carried out. The median parameter error corresponds to the run with the lowest objective function value.

c. For noisy data, the reported values are the mean  $\pm$  standard deviation of five technical replicates of the data.

d. Independent flux combination used in the main text.

**Table S3** Comparison of CPU times for the branched pathway case study with different partitioning of independent and dependent flux set.

| CPU time <sup>a</sup> (sec) | Noise-free data <sup>b</sup> |          | Noisy data <sup>c</sup> |                    |
|-----------------------------|------------------------------|----------|-------------------------|--------------------|
|                             | IFPE                         | IFPE-ODE | IFPE                    | IFPE-ODE           |
| Independent fluxes          |                              |          |                         |                    |
| $\{V_1, V_6\}^d$            | 1263                         | 2154     | $655.9 \pm 198.5$       | $1023 \pm 315$     |
| $\{V_1, V_5\}$              | 1806.8                       | 2912.3   | $677.4 \pm 205.0$       | $956.6 \pm 231.0$  |
| $\{V_2, V_6\}$              | 1995.7                       | 1775.4   | $1190.1 \pm 332.6$      | $1809.9 \pm 589.4$ |
| $\{V_1, V_3\}$              | 1152.9                       | 2399.7   | $562.6 \pm 334.2$       | $1529.9 \pm 656.5$ |
| $\{V_2, V_5\}$              | 2961.8                       | 3659.2   | $1285.9 \pm 141.1$      | $2055.4 \pm 392.8$ |
| $\{V_1, V_4\}$              | 1527.0                       | 3267.9   | $1067.8 \pm 890.5$      | $1241.8 \pm 299.0$ |

a. The CPU times were recorded using a workstation with Intel Xeon processor 3.33GHz with 18GB RAM.

b. For noise-free data, five independent runs were carried out. The CPU time is reported for the run with the lowest objective function value.

c. For noisy data, the reported values are the mean  $\pm$  standard deviation of five technical replicates of the data.

d. Independent flux combination used in the main text.

**Table S4** Comparison of the number of eSS iterations for the branched pathway case study with different partitioning of independent and dependent flux set.

| eSS iterations     | Noise-free data <sup>a</sup> |          | Noisy data <sup>b</sup> |                  |
|--------------------|------------------------------|----------|-------------------------|------------------|
|                    | IFPE                         | IFPE-ODE | IFPE                    | IFPE-ODE         |
| Independent fluxes |                              |          |                         |                  |
| $\{V_1, V_6\}^c$   | 112                          | 156      | $67.0 \pm 13.1$         | $70.2 \pm 11.8$  |
| $\{V_1, V_5\}$     | 158                          | 201      | $64.2 \pm 5.9$          | $66.8 \pm 2.9$   |
| $\{V_2, V_6\}$     | 147                          | 86       | $92.0 \pm 35.8$         | $96.8 \pm 41.4$  |
| $\{V_1, V_3\}$     | 169                          | 241      | $113.0 \pm 61.0$        | $151.6 \pm 69.2$ |
| $\{V_2, V_5\}$     | 194                          | 160      | $63.4 \pm 2.6$          | $80.6 \pm 31.6$  |
| $\{V_1, V_4\}$     | 162                          | 252      | $154.0 \pm 75.1$        | $78.6 \pm 15.2$  |

a. For noise-free data, five independent runs were carried out. The number of eSS iterations corresponds to the run with the lowest objective function value.

b. For noisy data, the reported values are the mean  $\pm$  standard deviation of five technical replicates of the data.

c. Independent flux combination used in the main text.

**Table S5** Comparison of concentration error  $\Phi$  for the branched pathway case study with different partitioning of independent and dependent flux set.

| concentration error<br>Independent fluxes | Noise-free data <sup>a</sup> |                       | Noisy data <sup>b</sup> |                   |
|-------------------------------------------|------------------------------|-----------------------|-------------------------|-------------------|
|                                           | IFPE                         | IFPE-ODE              | IFPE                    | IFPE-ODE          |
| $\{V_1, V_6\}^c$                          | $2.83 \times 10^{-4}$        | $1.65 \times 10^{-4}$ | $0.161 \pm 0.014$       | $0.157 \pm 0.014$ |
| $\{V_1, V_5\}$                            | $2.89 \times 10^{-4}$        | $1.71 \times 10^{-4}$ | $0.159 \pm 0.015$       | $0.158 \pm 0.014$ |
| $\{V_2, V_6\}$                            | $2.86 \times 10^{-4}$        | $1.81 \times 10^{-4}$ | $0.161 \pm 0.014$       | $0.159 \pm 0.013$ |
| $\{V_1, V_3\}$                            | $2.83 \times 10^{-4}$        | $1.68 \times 10^{-4}$ | $0.160 \pm 0.016$       | $0.157 \pm 0.014$ |
| $\{V_2, V_5\}$                            | $2.85 \times 10^{-4}$        | $1.85 \times 10^{-4}$ | $0.160 \pm 0.014$       | $0.159 \pm 0.013$ |
| $\{V_1, V_4\}$                            | $2.80 \times 10^{-4}$        | $1.54 \times 10^{-4}$ | $0.161 \pm 0.015$       | $0.157 \pm 0.014$ |

a. For noise-free data, five independent runs were carried out. The concentration error is reported for the run with the lowest objective function value.

b. For noisy data, the reported values are the mean  $\pm$  standard deviation of five technical replicates of the data.

c. Independent flux combination used in the main text.
